# Supplementary material for: Substituent effects on the hydrogen-bonded complex of aniline–H2O: a computational study
Source: Royal Society of Chemistry journal article supplement (doi:10.1039/b717465a), 2008-01-01
Supplement: b717465a.pdf [file b717465a.pdf]

**Table S1 The C–N Bond Lengths ( $R_{C-N}$ ) and Proton Donating N–H Bond Lengths ( $R_{N-H}$ ) and Stretching Frequencies ( $\nu_{N-H}$ ) in all *para*-substituted Aniline Monomers ( I ) and All Corresponding Monohydrated Complexes ( II ) and Variations of N–H Bond Lengths ( $\Delta R_{N-H}$ ) and C–N Bond lengths ( $\Delta R_{C-N}$ ) and N-H Stretching Frequencies ( $\nu_{N-H}$ ) and Corresponding Red Shifts of Frequencies ( $\Delta\nu_{N-H}$ ) upon Formation of the Complex, Calculated at the B3LYP/6-311++G(d, p) Level of Theory and Some Experimental Values of Frequencies in Brackets**

| X                | Bond Length, Å |        |                    |           |        |                    | Stretching Frequency, cm <sup>-1</sup> |                       |                         |                       |                       |                        |
|------------------|----------------|--------|--------------------|-----------|--------|--------------------|----------------------------------------|-----------------------|-------------------------|-----------------------|-----------------------|------------------------|
|                  | $R_{C-N}$      |        | $\Delta R_{C-N}^a$ | $R_{N-H}$ |        | $\Delta R_{N-H}^b$ | $\nu_{as\ N-H}$                        |                       | $\Delta\nu_{as\ N-H}^c$ | $\nu_{s\ N-H}$        |                       | $\Delta\nu_{s\ N-H}^d$ |
|                  | I              | II     | II – I             | I         | II     | II – I             | I                                      | II                    | II – I                  | I                     | II                    | II – I                 |
| NH <sub>2</sub>  | 1.4087         | 1.4030 | -0.0057            | 1.0105    | 1.0134 | 0.0029             | 3644.4                                 | 3635.7                | -8.7                    | 3551.8                | 3529.7                | -22.1                  |
| OH               | 1.4059         | 1.4002 | -0.0057            | 1.0101    | 1.0132 | 0.0031             | 3651.1                                 | 3642.0                | -9.1                    | 3557.7                | 3532.8                | -24.9                  |
| CH <sub>3</sub>  | 1.4011         | 1.3946 | -0.0065            | 1.0096    | 1.0128 | 0.0032             | 3659.9                                 | 3649.6                | -10.3                   | 3563.9                | 3536.2                | -27.7                  |
| H                | 1.3986         | 1.3915 | -0.0071            | 1.0093    | 1.0128 | 0.0035             | 3666.1                                 | 3654.8                | -11.3                   | 3568.6                | 3532.0                | -36.6                  |
|                  |                |        |                    |           |        |                    | (3508.2) <sup>e</sup>                  | (3485.0) <sup>f</sup> | -23.2                   | (3421.8) <sup>e</sup> | (3383.0) <sup>f</sup> | -38.8                  |
| F                | 1.4008         | 1.3945 | -0.0063            | 1.0095    | 1.0129 | 0.0034             | 3661.9                                 | 3651.4                | -10.5                   | 3566.4                | 3536.0                | -30.4                  |
| PH <sub>2</sub>  | 1.3931         | 1.3855 | -0.0076            | 1.0088    | 1.0126 | 0.0038             | 3673.8                                 | 3662.6                | -11.2                   | 3574.3                | 3538.8                | -35.5                  |
| SiH <sub>3</sub> | 1.3928         | 1.3852 | -0.0076            | 1.0088    | 1.0126 | 0.0038             | 3674.5                                 | 3662.9                | -11.6                   | 3574.5                | 3539.2                | -35.3                  |
| Cl               | 1.3962         | 1.3894 | -0.0068            | 1.0090    | 1.0128 | 0.0038             | 3669.4                                 | 3657.5                | -11.9                   | 3571.7                | 3536.6                | -35.1                  |
| CHO              | 1.3816         | 1.3727 | -0.0089            | 1.0077    | 1.0123 | 0.0046             | 3694.3                                 | 3681.6                | -12.7                   | 3588.7                | 3540.0                | -48.7                  |
| CN               | 1.3834         | 1.3752 | -0.0082            | 1.0079    | 1.0125 | 0.0046             | 3691.1                                 | 3677.8                | -13.3                   | 3587.1                | 3538.3                | -48.8                  |
|                  |                |        |                    |           |        |                    | (3538.0) <sup>g</sup>                  | (3532.0) <sup>g</sup> | -6.0                    | (3445.0) <sup>g</sup> | (3420.0) <sup>g</sup> | -25.0                  |
| NO <sub>2</sub>  | 1.3776         | 1.3685 | -0.0091            | 1.0073    | 1.0124 | 0.0051             | 3701.7                                 | 3687.9                | -13.8                   | 3594.5                | 3537.8                | -56.7                  |
|                  |                |        |                    |           |        |                    | (3510.0) <sup>h</sup>                  | (3477.0) <sup>h</sup> | -33.0                   | (3412.0) <sup>h</sup> | (3361.0) <sup>h</sup> | -51.0                  |

<sup>a</sup> $\Delta R_{C-N} = R_{C-N}(II) - R_{C-N}(I)$ ; <sup>b</sup> $\Delta R_{N-H} = R_{N-H}(II) - R_{N-H}(I)$ ; <sup>c</sup> $\Delta\nu_{as\ N-H} = \nu_{as\ N-H}(II) - \nu_{as\ N-H}(I)$ ; <sup>d</sup> $\Delta\nu_{s\ N-H} = \nu_{s\ N-H}(II) - \nu_{s\ N-H}(I)$ ; <sup>e</sup> From Ref. 48; <sup>f</sup> From Ref. 49; <sup>g</sup> From Ref. 10; <sup>h</sup> From Ref. 50.
